# Supplementary material for: Promoter DNA methylation analysis reveals a combined diagnosis of CpG-based biomarker for prostate cancer
Source: PubMed Central journal article supplement (PMC5601644; doi:10.18632/oncotarget.16437), 2017-03-22
Supplement: oncotarget-08-58199-s001.pdf [file oncotarget-08-58199-s001.pdf]

# Promoter DNA methylation analysis reveals a combined diagnosis of CpG-based biomarker for prostate cancer

## SUPPLEMENTARY FIGURE AND TABLES

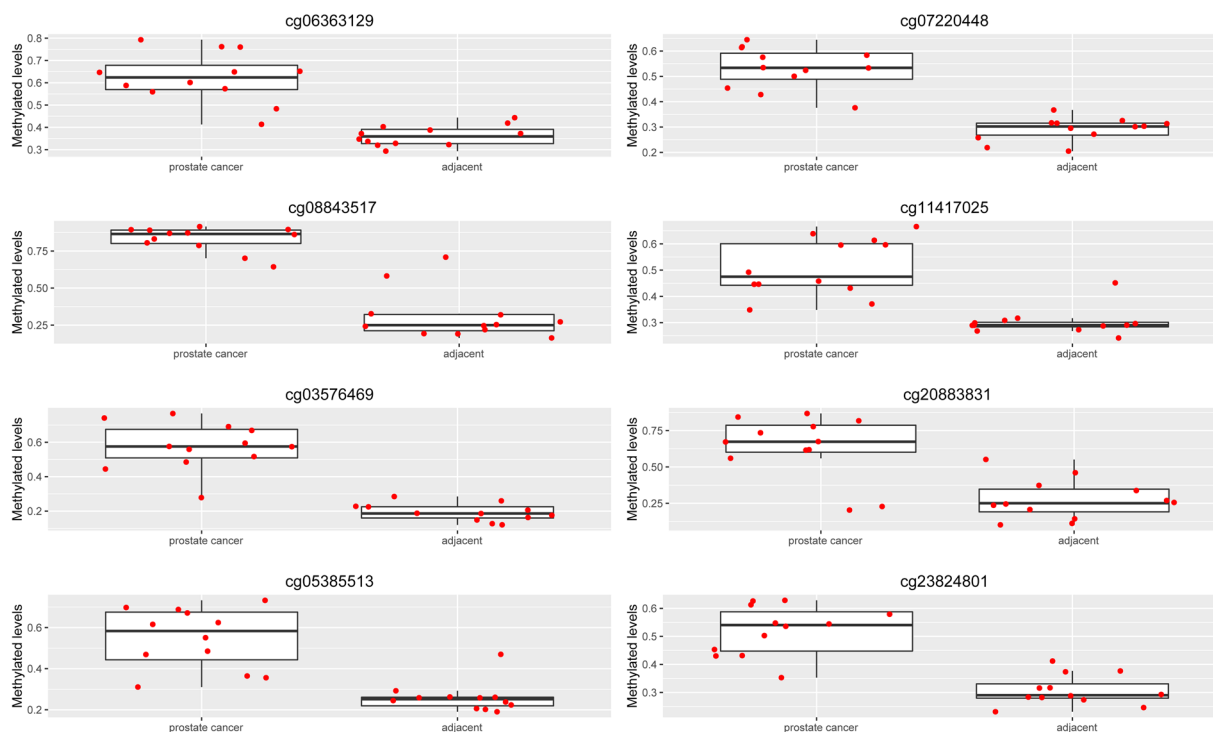

Supplementary Figure 1: The methylation levels of eight CpGs (cg06363129, cg08843517, cg03576469, cg05385513, cg07220448, cg11417025, cg20883831, and cg23824801) in 12 tumor samples and matched adjacent tissues from GSE74013.

Supplementary Table 1: The specific primers of methylated sites

| Sites      | Gene    | Primer | 5'- 3' base sequence           |
|------------|---------|--------|--------------------------------|
| cg06363129 | SOSTDC1 | F      | GTAGAAAAGGAGGAGTTTGGTATAT      |
|            |         | R      | CAAAACAACCTATAAAAAAACCAATCTCTT |
|            |         | S      | ATATAAATTGTTTGAAATTTTAGAG      |
| cg07220448 | SOSTDC1 | F      | GTAGAAAAGGAGGAGTTTGGTATAT      |
|            |         | R      | CAAAACAACCTATAAAAAAACCAATCTCTT |
|            |         | S      | ATATAAATTGTTTGAAATTTTAGAG      |
| cg11417025 | SOSTDC1 | F      | GTAGAAAAGGAGGAGTTTGGTATAT      |
|            |         | R      | CAAAACAACCTATAAAAAAACCAATCTCTT |
|            |         | S      | ATATAAATTGTTTGAAATTTTAGAG      |
| cg05385513 | EFEMP1  | F      | GGTTTGGTTAGGTAGGGAGATGA        |
|            |         | R      | ACCAACCCACAAAACCTTACCATAA      |
|            |         | S      | TAGGGAGATGAGGTT                |
| cg08843517 | CYBA    | F      | GGGATATTTTTTTAGGTTGTAGTTTTTAT  |
|            |         | R      | ACAACCCTACACCCTACAAATA         |
|            |         | S      | GATAAGAATTAGGTTGGGATATTG       |

F: forward primer; R: reverse primer; S: sequencing primer.

**Supplementary Table 2: 1585 differential CpGs within promoter**

See Supplementary File 1

**Supplementary Table 3: Diagnostic methylation CpGs in prostate cancer**

See Supplementary File 2

**Supplementary Table 4: The diagnostic methylation CpGs in 11 kinds of solid tumors**

See Supplementary File 3
